# Supplementary material for: Travel-Time Inversion Method of Converted Shear Waves Using RayInvr Algorithm
Source: MDPI journal article supplement (doi:10.3390/app11083571), 2021-04-16
Supplement: s1 [file s1]

Supporting Information for

## **Travel-time Inversion Method of Converted Shear Waves Using RayInvr Algorithm**

Genggeng Wen <sup>1,2,3</sup>, Kuiyuan Wan <sup>1,2\*</sup>, Shaohong Xia <sup>1,2\*</sup>, Huilong Xu <sup>1,2</sup>, Chaoyan Fan <sup>1,2</sup>, Jinghe Cao <sup>1,2</sup>

<sup>1</sup> CAS Key Laboratory of Ocean and Marginal Sea Geology, South China Sea  
Institute of Oceanology, Chinese Academy of Sciences, Guangzhou 510301, China

<sup>2</sup> Southern Marine Science and Engineering Guangdong Laboratory, Chinese  
Academy of Sciences (Guangzhou), 511458, China

<sup>3</sup> University of Chinese Academy of Sciences, Beijing 100049, China

**Corresponding author(s):** Kuiyuan Wan (kywan@scsio.ac.cn) & Shaohong Xia  
(shxia@scsio.ac.cn)

### **Contents of this file**

Figures S1 to S3

Table S1

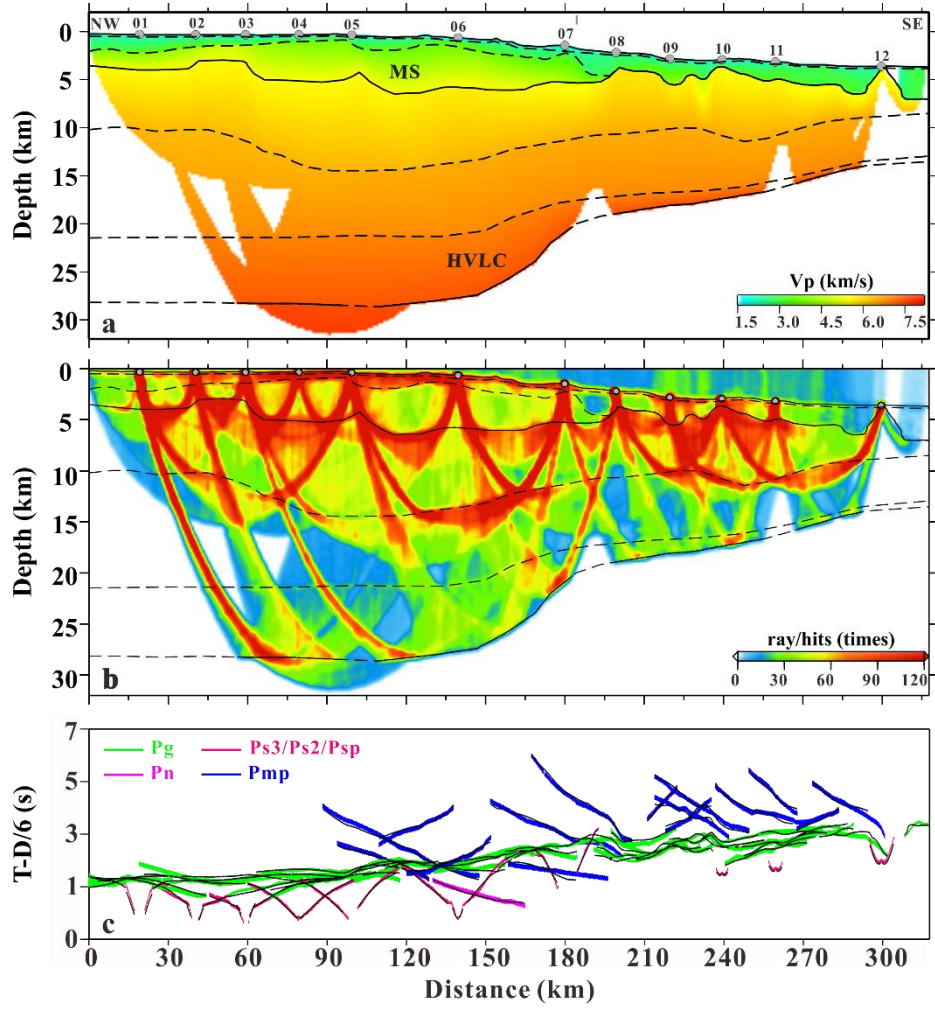

**Figure S1.** (a) Results of the forward P-wave velocity *RayInvr* model, along profile NS5. Gray circles are OBS locations. The transect is divided into three parts: upper slope, lower slope, and oceanic basin. (b) Ray coverage density distribution. The ray number counting grid has a cell size of  $1 \times 0.25$  km, the blank areas are uncovered. (c) Comparison of the picked (colour) and calculated (black) travel times of the same phases, for each OBS. MS: Mesozoic strata, HVLC: high velocity lower crust.

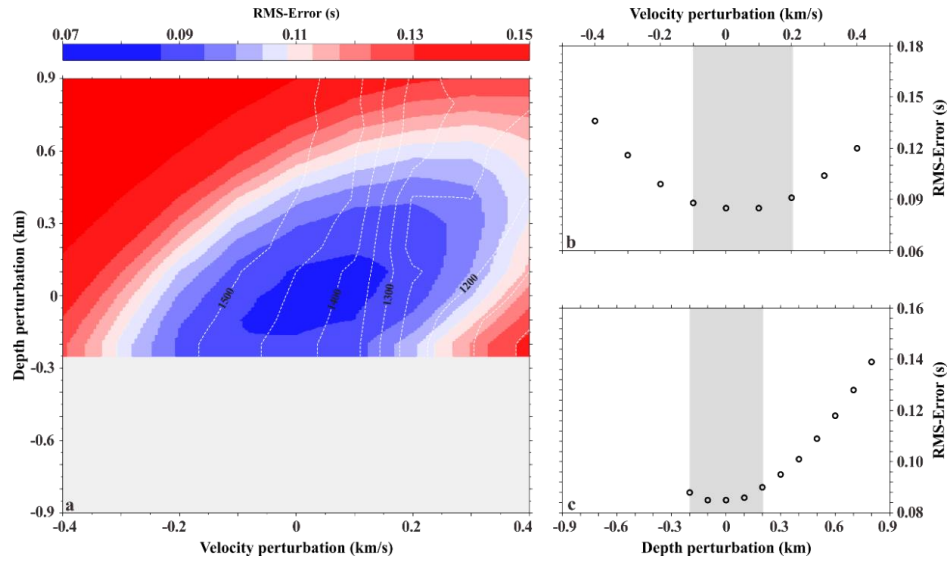

**Figure S2.** (a) Results from simultaneously varying the depth of the Moho and P-wave velocities in the layer of high velocity lower crust. Contours indicate the number of Pmp phases explained by the forward model. (b) Results from varying the P-wave velocities only in the layer of high velocity lower crust. (c) Results from varying the depth of the Moho. Gray box represents calculated uncertainties from 95% confidence limit of F-test.

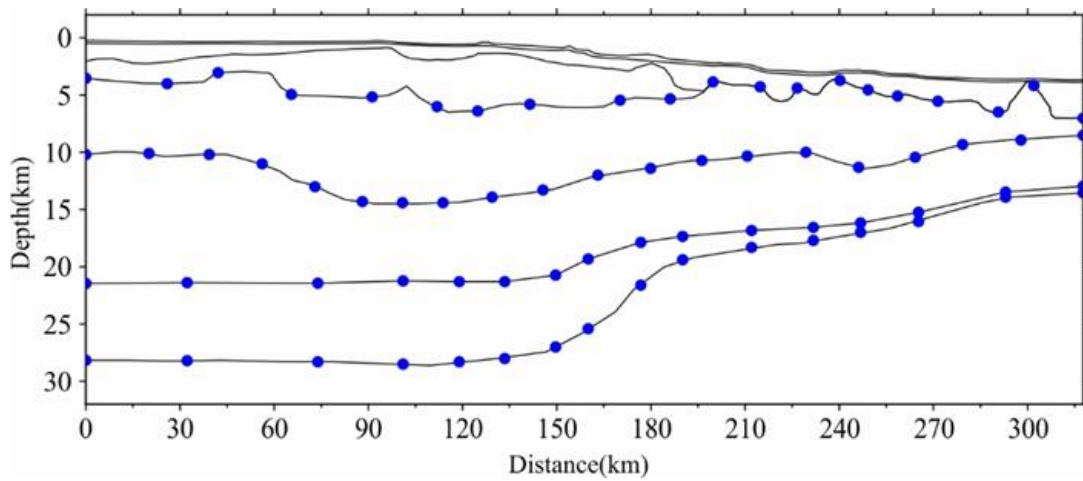

**Figure S3.** The velocities grid nodes for the inversion. The average inversion grid is set to 14, 16.5 and 19 km in the upper crust, lower crust and high-velocity lower crust, respectively.

**Table S1** The polarization angle for each OBS

|             |             |             |            |             |            |
|-------------|-------------|-------------|------------|-------------|------------|
| OBS01: 61°  | OBS03: 37°  | OBS05: 147° | OBS07: 45° | OBS09: 95°  | OBS11: 47° |
| OBS02: 140° | OBS04: 14 ° | OBS06: 130° | OBS08: 48° | OBS11: 117° | OBS12: 9°  |
