# Supplementary material for: Travel-Time Inversion Method of Converted Shear Waves Using RayInvr Algorithm
Source: MDPI journal article supplement (doi:10.3390/app11083571), 2021-04-16
Supplement: s1 [file s1]

Archive with 1 entries (1 files):
- applsci-1159007-supplementary.pdf
